# Supplementary material for: Automatic identification of optimal marker genes for phenotypic and taxonomic groups of microorganisms
Source: PLoS One. 2018 May 2;13(5):e0195537. doi: 10.1371/journal.pone.0195537 (PMC5931505; doi:10.1371/journal.pone.0195537)
Supplement: S1 File — Table A in S1 Fie) Archaea genomes; Table B in S1 File) Escherichia/Shigella genomes; Table C in S1 File) nitrifiers HS; Table D in S1 File) Escherichia/Shigella HS; Table E in S1 File) AIEC (adherent-invasive E. coli) HS; Table F in S1 File) EPEC (enteropathogenic E. coli) HS. Table G in S1 File) EAHEC (enteroaggregative hemorrhagic E. coli) HS. (XLSX) [file pone.0195537.s001.xlsx]

## Sheet: A-Archaea genomes
Name	KEGG code
Aciduliprofundum boonei T469	abi
Aciduliprofundum sp. MAR08-339	acf
Aeropyrum camini SY1 = JCM 12091 SY1	acj
Archaeoglobus fulgidus DSM 8774	afg
Archaeoglobus fulgidus DSM 4304	afu
archaeon GW2011_AR10	agw
Acidianus hospitalis W1	aho
Aeropyrum pernix K1	ape
Archaeoglobus profundus DSM 5631	apo
archaeon GW2011_AR20	arg
Acidilobus saccharovorans 345-15	asc
Archaeoglobus sulfaticallidus PM70-1	ast
Archaeoglobus veneficus SNP6	ave
Caldisphaera lagunensis DSM 15908	clg
Caldivirga maquilingensis IC-167	cma
Caldiarchaeum subterraneum	csu
Cenarchaeum symbiosum	csy
Desulfurococcus fermentans DSM 16532	dfd
Desulfurococcus kamchatkensis 1221n	dka
Desulfurococcus mucosus DSM 2162	dmu
Ferroplasma acidarmanus fer1	fac
Fervidicoccus fontis Kam940	ffo
Ferroglobus placidus DSM 10642	fpl
Haloferax mediterranei ATCC 33500	gm02962
Sulfolobus islandicus M.16.47	gm02972
Sulfolobus islandicus M.16.2	gm02973
Sulfolobus islandicus M.16.23	gm02974
Sulfolobus islandicus M.16.43	gm02975
Sulfolobus islandicus M.16.40	gm02976
Methanolinea tarda NOBI-1	gm03592
archaeon GW2011_AR15	gm03624
Methanoplasma termitum MpT1	gm03626
Nitrosopelagicus brevis V2	gm03627
Nitrosopumilus sp. NF5	gm03629
Geoglobus acetivorans SBH6	gm03630
Geoglobus ahangari 234	gm03631
Metallosphaera sedula CuR1	gm03634
Methanobacterium formicicum BRM9	gm03635
Methanobacterium formicicum	gm03636
Methanocaldococcus sp. JH146	gm03637
Methanococcoides methylutens MM1	gm03638
Methanosarcina barkeri 227	gm03641
Methanosarcina barkeri 3	gm03642
Methanosarcina barkeri CM1	gm03643
Methanosarcina barkeri MS	gm03644
Methanosarcina barkeri Wiesmoor	gm03645
Methanosarcina horonobensis HB-1 = JCM 15518 HB-1	gm03646
Methanosarcina lacustris Z-7289	gm03647
Methanosarcina mazei C16	gm03648
Methanosarcina mazei LYC	gm03649
Methanosarcina mazei S-6	gm03650
Methanosarcina mazei SarPi	gm03651
Methanosarcina mazei WWM610	gm03652
Methanosarcina siciliae C2J	gm03653
Methanosarcina siciliae T4/M	gm03655
Methanosarcina sp. Kolksee	gm03656
Methanosarcina sp. MTP4	gm03657
Methanosarcina sp. WH1	gm03658
Methanosarcina sp. WWM596	gm03659
Methanosarcina thermophila TM-1	gm03661
Methanosarcina vacuolata Z-761	gm03662
Methanothermobacter sp. CaT2	gm03663
Sulfolobus solfataricus SULA	gm03665
Sulfolobus solfataricus SULB	gm03666
Thaumarchaeota archaeon SAT1	gm03667
Haloarcula sp. CBA1115	hab
halophilic archaeon DL31	hah
Halobacterium sp. NRC-1	hal
Halogeometricum borinquense DSM 11551	hbo
Hyperthermus butylicus DSM 5456	hbu
Halobacterium sp. DL1	hdl
Haloarcula hispanica ATCC 33960	hhi
Haloarcula hispanica N601	hhn
Halalkalicoccus jeotgali B3	hje
Halorubrum lacusprofundi ATCC 49239	hla
Halostagnicola larsenii XH-48	hlr
Haloarcula marismortui ATCC 43049	hma
Haloferax mediterranei ATCC 33500 CGMCC 1.2087	hme
Halomicrobium mukohataei DSM 12286	hmu
Halovivax ruber XH-70	hru
Halobacterium salinarum R1; DSM 671	hsl
Halanaeroarchaeum sulfurireducens HSR2	hsu
Halorhabdus tiamatea SARL4B type strain: SARL4B	hti
Haloterrigena turkmenica DSM 5511	htu
Halorhabdus utahensis DSM 12940	hut
Haloferax volcanii DS2	hvo
Haloquadratum walsbyi DSM 16790 : HBSQ001	hwa
Haloquadratum walsbyi C23 DSM 16854	hwc
Halopiger xanaduensis SH-6	hxa
Ignisphaera aggregans DSM 17230	iag
Ignicoccus hospitalis KIN4/I	iho
Korarchaeum cryptofilum OPF8	kcr
Methanosarcina acetivorans C2A	mac
Methanococcus aeolicus Nankai-3	mae
Methanomethylophilus alvus Mx1201	max
Methanosarcina barkeri fusaro	mba
Methanoculleus bourgensis MS2 type strain:MS2	mbg
Methanoregula boonei 6A8	mbn
Methanococcoides burtonii DSM 6242	mbu
Methanosaeta concilii GP6	mcj
Metallosphaera cuprina Ar-4	mcn
Methanobrevibacter sp. AbM4	meb
Methanobacterium sp. AL-21	mel
Methanoculleus marisnigri JR1	mem
Methanomassiliicoccus intestinalis Issoire-Mx1 Mx1-Issoire	mer
Methanobacterium sp. MB1	meth
Methanohalobium evestigatum Z-7303	mev
Methanobacterium sp. SWAN-1	mew
Methanocella conradii HZ254	mez
Methanocaldococcus fervens AG86	mfe
Methanoregula formicicum SMSP	mfo
Methanocaldococcus sp. FS406-22	mfs
Methanothermus fervidus DSM 2088	mfv
Methanosaeta harundinacea 6Ac	mhi
Methanospirillum hungatei JF-1	mhu
Methanomethylovorans hollandica DSM 15978	mhz
Methanocaldococcus infernus ME	mif
Methanotorris igneus Kol 5	mig
Methanococcus jannaschii DSM 2661	mja
Methanopyrus kandleri AV19	mka
Methanocorpusculum labreanum Z	mla
Methanosarcina mazei Goe1	mma
Methanosarcina mazei Tuc01	mmaz
Methanococcus maripaludis X1	mmd
Methanothermobacter marburgensis Marburg	mmg
Methanohalophilus mahii DSM 5219	mmh
Methanococcus maripaludis S2	mmp
Methanococcus maripaludis C5	mmq
Methanococcus maripaludis C6	mmx
Methanococcus maripaludis C7	mmz
Methanothermococcus okinawensis IH1	mok
Methanocella paludicola SANAE	mpd
Methanoplanus petrolearius DSM 11571	mpi
Methanosphaerula palustris E1-9c	mpl
Methanolobus psychrophilus R15	mpy
Methanobrevibacter ruminantium M1	mru
Metallosphaera sedula DSM 5348	mse
Methanobrevibacter smithii ATCC 35061; PS; DSMZ 861	msi
Methanosphaera stadtmanae DSM 3091	mst
Methanosarcina siciliae HI350	msz
Methanothermobacter thermautotrophicus delta H	mth
Methanosarcina thermophila CHTI-55	mthe
Methanosaeta thermophila PT	mtp
Methanococcus vannielii SB	mvn
Methanococcus voltae A3	mvo
Methanocaldococcus vulcanius M7	mvu
Methanosalsum zhilinae DSM 4017	mzh
Natrinema sp. J7-2	nat
Nanoarchaeum equitans Kin4-M	neq
Nitrososphaera evergladensis SR1	nev
Nitrososphaera gargensis Ga9.2	nga
Natronobacterium gregoryi SP2	nge
Nitrosopumilus sp. D3C	nid
Nitrosopumilus sp. AR2	nir
Nitrosopumilus koreensis AR1	nkr
Natrialba magadii ATCC 43099	nmg
Natronomonas moolapensis 8.8.11	nmo
Nitrosopumilus maritimus SCM1	nmr
Natronococcus occultus SP4	nou
Natrinema pellirubrum DSM 15624	npe
Natronomonas pharaonis DSM 2160; Gabara	nph
Nitrososphaera viennensis EN76	nvn
Pyrococcus abyssi GE5	pab
Pyrobaculum aerophilum IM2	pai
Pyrobaculum arsenaticum DSM 13514	pas
Pyrobaculum calidifontis JCM 11548	pcl
Pyrococcus furiosus COM1	pfi
Pyrolobus fumarii 1A	pfm
Pyrococcus furiosus DSM 3638	pfu
Pyrococcus horikoshii OT3	pho
Pyrobaculum islandicum DSM 4184	pis
Pyrobaculum oguniense TE7	pog
Palaeococcus pacificus DY20341	ppac
Picrophilus torridus DSM 9790	pto
Pyrococcus yayanosii CH1	pya
Pyrococcus sp. NA2	pyn
Pyrobaculum sp. 1860	pyr
Pyrococcus sp. ST04	pys
uncultured methanogenic archaeon RC-I	rci
Sulfolobus acidocaldarius N8	sacn
Sulfolobus acidocaldarius Ron12/I	sacr
Sulfolobus acidocaldarius SUSAZ	sacs
Sulfolobus acidocaldarius DSM 639	sai
Salinarchaeum sp. Harcht-Bsk1	sali
Staphylothermus hellenicus DSM 12710	shc
Sulfolobus islandicus M.14.25	sia
Sulfolobus islandicus LAL14/1	sic
Sulfolobus islandicus M.16.4	sid
Sulfolobus islandicus HVE10/4	sih
Sulfolobus islandicus L.D.8.5	sii
Sulfolobus islandicus M.16.27	sim
Sulfolobus islandicus Y.N.15.51	sin
Sulfolobus islandicus REY15A	sir
Sulfolobus islandicus L.S.2.15	sis
Sulfolobus islandicus Y.G.57.14	siy
Staphylothermus marinus F1	smr
Sulfolobus solfataricus 98/2	sol
Sulfolobus solfataricus P2	sso
Sulfolobus solfataricus 98/2 SULC	ssof
Sulfolobus tokodaii 7	sto
Thermoplasma acidophilum DSM 1728	tac
Thermosphaera aggregans DSM 11486	tag
Thermoplasmatales archaeon BRNA1	tar
Thermococcus barophilus MP	tba
Thermofilum carboxyditrophus 1505	tcb
Thermococcus eurythermalis A501	teu
Thermococcus gammatolerans EJ3	tga
Thermococcus sp. AM4	tha
Thermofilum sp. 1910b	thb
Thermococcus sp. 4557	the
Thermofilum sp. 1807-2	thf
Thermogladius cellulolyticus 1633	thg
Thermococcus sp. CL1	thm
Thermococcus sp. ES1	ths
Thermococcus kodakarensis KOD1	tko
Thermococcus litoralis DSM 5473	tlt
Thermoproteus neutrophilus V24Sta	tne
Thermococcus nautili 30-1	tnu
Thermococcus onnurineus NA1	ton
Thermofilum pendens Hrk 5	tpe
Thermococcus sibiricus MM 739	tsi
Thermoproteus tenax Kra 1	ttn
Thermoproteus uzoniensis 768-20	tuz
Thermoplasma volcanium GSS1	tvo
Vulcanisaeta distributa DSM 14429	vdi
Vulcanisaeta moutnovskia 768-28	vmo

## Sheet: B-Escherichia_Shigella genomes
Name	KEGG code	Pathogroup
Escherichia coli LF82	ecd	AIEC
Escherichia coli O83:H1 NRG 857C	eoi	AIEC
Escherichia coli UM146	gm03588	AIEC
Escherichia coli APEC O1	gm04130	APEC
Escherichia coli APEC O78	gm04131	APEC
Escherichia coli ACN001	gm04128	APEC
Escherichia coli APEC IMT5155	gm04129	APEC
Escherichia coli 042	gm03458	EAEC
Escherichia coli 55989	gm04125	EAEC
Escherichia coli O104:H4 C227-11	gm03407	EAEC
Escherichia coli O104:H4 2009EL-2050	gm04169	EAHEC
Escherichia coli O104:H4 2009EL-2071	gm03425	EAHEC
Escherichia coli O104:H4 2011C-3493	ecj	EAHEC
Escherichia coli 11128	gm03466	EHEC
Escherichia coli 11368	gm04123	EHEC
Escherichia coli 12009	gm04124	EHEC
Escherichia coli EC4115	ecoa	EHEC
Escherichia coli EDL933	ebl	EHEC
Escherichia coli O157:H7 SS17	eoh	EHEC
Escherichia coli Sakai	ecf	EHEC
Escherichia coli TW14359	eum	EHEC
Escherichia coli Xuzhou21	eld	EHEC
Escherichia coli HUSEC2011	ecq	EHEC
Escherichia coli O157 Santai	ena	EHEC
Escherichia coli O157:H7 EDL933	gm03475	EHEC
Escherichia coli O157:H7 SS52	esm	EHEC
Escherichia coli CFSAN029787	gm04144	EIEC
Escherichia coli MNCRE44	ecok	EIEC
Escherichia coli CB9615	ebd	EPEC
Escherichia coli E2348/69	gm04146	EPEC
Escherichia coli O55:H7 RM12579	esl	EPEC
Escherichia coli B7A	gm04134	ETEC
Escherichia coli E24377A	ecv	ETEC
Escherichia coli ETEC H10407	ecl	ETEC
Escherichia coli UMNF18	eci	ETEC
Escherichia coli UMNK88	gm04170	ETEC
Escherichia coli SEC470	gm03508	ETEC
Escherichia coli PMV-1	gm03500	ExPEC
Escherichia coli PCN033	ecw	ExPEC
Escherichia coli IHE3034	gm04153	NMEC
Escherichia coli O7:K1 CE10	gm04165	NMEC
Escherichia coli S88	gm04166	NMEC
Escherichia coli SECEC SMS-3-5	gm04167	Non-pathogenic
Escherichia coli W	elx	Non-pathogenic
Escherichia coli W	elc	Non-pathogenic
Escherichia coli ATCC 25922	gm04132	Non-pathogenic
Escherichia coli ATCC 8739	gm04133	Non-pathogenic
Escherichia coli BL21(DE3)	gm04136	Non-pathogenic
Escherichia coli BL21(DE3)	gm04137	Non-pathogenic
Escherichia coli BL21(DE3)	gm04138	Non-pathogenic
Escherichia coli BW25113 K-12	gm04139	Non-pathogenic
Escherichia coli BW2952	gm04140	Non-pathogenic
Escherichia coli C321.deltaA	gm04141	Non-pathogenic
Escherichia coli DH1	eab	Non-pathogenic
Escherichia coli DH1	gm04145	Non-pathogenic
Escherichia coli ED1a	gm03495	Non-pathogenic
Escherichia coli HS	gm04150	Non-pathogenic
Escherichia coli IAI1	elh	Non-pathogenic
Escherichia coli K-12 DH10B	ecr	Non-pathogenic
Escherichia coli K-12 ER3413	ect	Non-pathogenic
Escherichia coli K-12 ER3435	eih	Non-pathogenic
Escherichia coli K-12 ER3440	ecoj	Non-pathogenic
Escherichia coli K-12 ER3445	gm04155	Non-pathogenic
Escherichia coli K-12 ER3446	gm04156	Non-pathogenic
Escherichia coli K-12 ER3454	gm04157	Non-pathogenic
Escherichia coli K-12 ER3466	gm04158	Non-pathogenic
Escherichia coli K-12 ER3475	gm04159	Non-pathogenic
Escherichia coli K-12 ER3476	gm04160	Non-pathogenic
Escherichia coli K-12 MG1655	gm04161	Non-pathogenic
Escherichia coli K-12 substr. HMS174	gm04162	Non-pathogenic
Escherichia coli K-12 substr. RV308	gm04163	Non-pathogenic
Escherichia coli K-12 W3110	gm04164	Non-pathogenic
Escherichia coli KO11FL	ebw	Non-pathogenic
Escherichia coli KO11FL KO11	gm04151	Non-pathogenic
Escherichia coli LY180	gm03383	Non-pathogenic
Escherichia coli Nissle 1917	gm03566	Non-pathogenic
Escherichia coli REL606	ecoo	Non-pathogenic
Escherichia coli SE11	ece	Non-pathogenic
Escherichia coli SE15	gm03518	Non-pathogenic
Escherichia coli str. K-12 substr. MC4100 K-12	ecz	Non-pathogenic
Escherichia coli str. K-12 substr. MDS42 K-12	ecy	Non-pathogenic
Escherichia coli str. K-12 substr. MG1655 K-12	ese	Non-pathogenic
Escherichia coli str. K-12 substr. MG1655 K-12	ecm	Non-pathogenic
Escherichia coli str. K-12 substr. MG1655 K-12	elu	Non-pathogenic
Escherichia coli ER2796	ebe	Non-pathogenic
Escherichia coli GM4792	edh	Non-pathogenic
Escherichia coli GM4792	edj	Non-pathogenic
Escherichia coli K-12	ecx	Non-pathogenic
Escherichia coli NCM3722	gm03564	Non-pathogenic
Escherichia coli O145:H28 RM12581	eko	STEC
Escherichia coli O145:H28 RM12761	ekf	STEC
Escherichia coli O145:H28 RM13514	elf	STEC
Escherichia coli O145:H28 RM13516	ecol	STEC
Escherichia coli 94-3024	gm04126	STEC
Escherichia coli RM9387	ecoh	STEC
Escherichia coli 536	gm03461	UPEC
Escherichia coli ABU 83972	gm04127	UPEC
Escherichia coli CFT073	ecp	UPEC
Escherichia coli IAI39	gm04152	UPEC
Escherichia coli JJ1886	gm04154	UPEC
Escherichia coli NA114	eco	UPEC
Escherichia coli O25b:H4-ST131 EC958	eso	UPEC
Escherichia coli ST2747	eok	UPEC
Escherichia coli ST2747	elr	UPEC
Escherichia coli ST2747	eoc	UPEC
Escherichia coli ST540	eln	UPEC
Escherichia coli ST540	elp	UPEC
Escherichia coli ST540	gm03591	UPEC
Escherichia coli str. 'clone D i14' clone D i14	gm04168	UPEC
Escherichia coli str. 'clone D i2' clone D i2	ecoi	UPEC
Escherichia coli UMN026	eun	UPEC
Escherichia coli UTI89	elw	UPEC
Escherichia coli CI5	eck	UPEC
Escherichia coli KLY	gm04149	Unknown
Escherichia coli P12b	ecg	Unknown
Escherichia coli ECC-1470	gm04148	Unknown
Escherichia coli FAP1	ecc	Unknown
Escherichia coli VR50	ell	Unknown
Escherichia coli ECONIH1	ebr	Unknown
Escherichia coli 789	gm03462	Unknown
Escherichia coli 1303	gm03463	Unknown
Escherichia coli 6409	gm03464	Unknown
Escherichia coli BL21 (TaKaRa)	gm04135	Unknown
Escherichia coli C41(DE3)	gm04142	Unknown
Escherichia coli C43(DE3)	gm04143	Unknown
Escherichia coli PCN061	gm03517	Unknown
Escherichia coli SQ110	ecs	Unknown
Escherichia coli SQ171	etw	Unknown
Escherichia coli SQ2203	gm03604	Unknown
Escherichia coli SQ37	eoj	Unknown
Escherichia coli SQ88	elo	Unknown
Shigella boydii ATCC 9210	gm04569	Unknown
Shigella boydii BS512; CDC 3083-94	sbc	Unknown
Shigella boydii Sb227	sbo	Unknown
Shigella dysenteriae 1617	sdz	Unknown
Shigella dysenteriae Sd197	sdy	Unknown
Shigella flexneri	gm04570	Unknown
Shigella flexneri 2002017	sfe	Unknown
Shigella flexneri 2003036	gm04571	Unknown
Shigella flexneri 2457T	sfx	Unknown
Shigella flexneri 301	sfl	Unknown
Shigella flexneri 5 8401	sfv	Unknown
Shigella flexneri G1663	gm04572	Unknown
Shigella flexneri Shi06HN006	gm04573	Unknown
Shigella sonnei CFSAN030807	gm04574	Unknown
Shigella sonnei 53G	ssj	Unknown
Shigella sonnei Ss046	ssn	Unknown

## Sheet: C-Nitrifiers HS
HS	Gene name 1	Gene name 2	Gene name 3	Gene name 4	Gene name 5
1	Hopanoid biosynthesis associated radical SAM protein HpnH MSWAN_1363(2)	dnaX, DNA polymerase III subunit gamma/tau TBIS_RS17620(3)	norD, Nitric oxide reductase activation protein MCMEM_RS03855	attH, Iron ABC transporter permease BRM9_RS11970	Dihydrolipoamide dehydrogenase CALAG_0616(2)
2	Hopanoid biosynthesis associated radical SAM protein HpnH MSWAN_1363(2)	slyD, peptidylprolyl isomerase ASAC_0185(1)	norD, Nitric oxide reductase activation protein MCMEM_RS03856	hypothetical ACAM_0142	TonB-dependent receptor RMAR_RS03430(2)
3	Hopanoid biosynthesis associated radical SAM protein HpnH MSWAN_1363(2)	slyD, peptidylprolyl isomerase ASAC_0185(1)	norD, Nitric oxide reductase activation protein MCMEM_RS03857	nirK, nitrite reductase HAH_0129(2)	2,3-bisphosphoglycerate-dependent phosphoglycerate mutase ASAC_1494(1)
4	Hopanoid biosynthesis associated radical SAM protein HpnH MSWAN_1363(2)	slyD, peptidylprolyl isomerase ASAC_0185(1)	nirC, Formate/nitrite transporter TPEN_0191	rbcL, ribulose bisphosphate carboxylase large chain DESFE_1247	cysG, Siroheme synthase ASAC_0114
5	Hopanoid biosynthesis associated radical SAM protein HpnH MSWAN_1363(2)	slyD, peptidylprolyl isomerase ASAC_0185(1)	nirC, Formate/nitrite transporter TPEN_0192	rbcL, ribulose bisphosphate carboxylase large chain DESFE_1248	norD, Nitric oxide reductase activation protein MCMEM_RS03857

## Sheet: D-Escherichia_Shigella HS
HS	Gene name 1	Gene name 2
1	phnC Phosphonate ABC transporter ATP-binding protein POGU_2216(1)	yhiF transcription regulator BU34_RS22080
2	uidR TetR family transcriptional regulator YM304_RS05670	yhiF transcription regulator BU34_RS22081
3	yidF Transcriptional regulator L21SP4_00182(2)	yhiF transcription regulator BU34_RS22082
4	yfaP Tetratricopeptide repeat protein ACPL_RS33800(2)	yhiF transcription regulator BU34_RS22083
5	fucI L-fucose isomerase PAP_RS05055	yhiF transcription regulator BU34_RS22084
6	grxB Glutaredoxin TM49_RS14335	yhiF transcription regulator BU34_RS22085
7	YfdX protein precursor SINAC_RS17205	yhiF transcription regulator BU34_RS22086
8	yecJ DUF2766 domain-containing protein LH86_RS17985	yhiF transcription regulator BU34_RS22087
9	ymjA DUF2543 domain-containing protein LH86_RS20305	yhiF transcription regulator BU34_RS22088
10	yaaI Conserved protein, UPF0412 family CYAN7425_RS02365	yhiF transcription regulator BU34_RS22089

## Sheet: E-AIEC HS
HS	Gene name 1	Gene name 2	Gene name 3
1	int-integrase AFER_RS06745(4)	lar-Restriction alleviation and modification enhancement protein YP_001730347.1	hypothetical ECRV308_RS01755
2	int-integrase AFER_RS06745(4)	tnpR-transposase SRM_RS04295(2)	hypothetical ECRV308_RS01756
3	int-integrase AFER_RS06745(1)	tnpR-transposase SRM_RS04295(2)	hypothetical ECRV308_RS01757
4	gltB-Membrane serine protease PARS_2056(4)	tnpR-transposase SRM_RS04295(2)	hypothetical ECRV308_RS01758
5	Rha-transcriptional regulator CDC7B_RS10775(2)	tnpR-transposase SRM_RS04295(2)	hypothetical ECRV308_RS01759
6	DNA replication protein O KR76_RS16690	tnpR-transposase SRM_RS04295(2)	hypothetical ECRV308_RS01760
7	Bacteriophage DNA replication protein O EPRO_0905	tnpR-transposase SRM_RS04295(2)	hypothetical ECRV308_RS01761
8	DNA replication protein O KR76_RS16690	tnpR-transposase SRM_RS04295(2)	yjeN-hypothetical YP_001732926.1
9	Rha-transcriptional regulator CDC7B_RS10775(2)	tnpR-transposase SRM_RS04295(2)	yjeN-hypothetical YP_001732926.1

## Sheet: F-EPEC HS
HS	Gene name 1	Gene name 2	Gene name 3	Gene name 4	Gene name 5
1	insO2-transposase, integrase MCP_0208(3)	Conserved hypothetical protein from phage origin ENTAS_RS13760	yedK-Putative SOS response-associated peptidase hje:HACJB3_05960(3)	impC-DNA-damage-inducible protein DinI CFNIH1_RS24305	membrane protein encoded by prophage CP-933K BU34_RS02640
2	hsdR Type I restriction endonuclease subunit R YN1551_3202(1)	RNA polymerase sigma factor YM304_RS21285(1)	yedK-Putative SOS response-associated peptidase hje:HACJB3_05960(3)	impC-DNA-damage-inducible protein DinI CFNIH1_RS24306	membrane protein encoded by prophage CP-933K BU34_RS02641
3	hsdR Type I restriction endonuclease subunit R YN1551_3202(1)	tnpA-transposase MCP_0787(2)	yedK-Putative SOS response-associated peptidase hje:HACJB3_05960(3)	impC-DNA-damage-inducible protein DinI CFNIH1_RS24307	membrane protein encoded by prophage CP-933K BU34_RS02642
4	hsdR Type I restriction endonuclease subunit R YN1551_3202(1)	tnpA-transposase MCP_0787(2)	yedK-Putative SOS response-associated peptidase hje:HACJB3_05960(3)	impC-DNA-damage-inducible protein DinI CFNIH1_RS24308	membrane protein encoded by prophage CP-933K BU34_RS02643
5	hsdR Type I restriction endonuclease subunit R YN1551_3202(1)	int-integrase CPIN_RS31315(1)	yedK-Putative SOS response-associated peptidase hje:HACJB3_05960(3)	impC-DNA-damage-inducible protein DinI CFNIH1_RS24309	membrane protein encoded by prophage CP-933K BU34_RS02644
6	hsdR Type I restriction endonuclease subunit R YN1551_3202(1)	insI-transposase CELF_RS18515(2)	yedK-Putative SOS response-associated peptidase hje:HACJB3_05960(3)	impC-DNA-damage-inducible protein DinI CFNIH1_RS24310	membrane protein encoded by prophage CP-933K BU34_RS02645
7	int-integrase CPIN_RS31315(1)	Conserved hypothetical protein from phage origin ENTAS_RS13760	yedK-Putative SOS response-associated peptidase hje:HACJB3_05960(3)	impC-DNA-damage-inducible protein DinI CFNIH1_RS24311	membrane protein encoded by prophage CP-933K BU34_RS02646
